# Supplementary material
Source: PubMed Central journal article supplement (PMC5159194)
Supplement: NIHMS806252-supplement-supplement_1.pdf [file NIHMS806252-supplement-supplement_1.pdf]

## **Supplemental Materials**

### **Supplement to: Cao *et al.*, Regular Aspirin Use Associates with Lower Risk of Colorectal Cancers With Low Numbers of Tumor-infiltrating Lymphocyte**

Supplemental Table 1. Age-standardized characteristics comparing cases with and without immunity data

Supplemental Table 2. Regular aspirin use and risk of colorectal cancer by stage and tumor-infiltrating lymphocytes

Supplemental Table 3. Regular aspirin use, tumor-infiltrating lymphocytes and colorectal cancer-specific mortality

Supplemental Table 4. Regular use of NSAIDs and risk of colorectal cancer overall and by components of lymphocytic reaction

**Supplemental Table 1. Age-standardized characteristics comparing cases with and without immunity data**

| Characteristic                                  | NHS                      |                             | HPFS                     |                             |
|-------------------------------------------------|--------------------------|-----------------------------|--------------------------|-----------------------------|
|                                                 | Cases with immunity data | Cases without immunity data | Cases with immunity data | Cases without immunity data |
| Cases, No.                                      | 830                      | 928                         | 628                      | 632                         |
| Age at diagnosis, y*                            | 68.3 (61.4-73.5)         | 66.6 (60.0-73.6)            | 72.3 (65.4-77.6)         | 70.7 (64.0-77.6)            |
| Family history of cancer, %                     | 20                       | 20                          | 18                       | 17                          |
| History of diabetes, %                          | 10                       | 10                          | 10                       | 13                          |
| BMI, kg/m <sup>2</sup>                          | 25.1 (22.7-28.6)         | 24.9 (22.5-28.2)            | 25.7 (24.0-27.6)         | 25.9 (24.2-28.2)            |
| Postmenopause, %                                | 91                       | 92                          | -                        | -                           |
| Menopausal hormone therapy, %                   | 23                       | 18                          | -                        | -                           |
| History of colonoscopy/sigmoidoscopy, %         | 37                       | 32                          | 45                       | 45                          |
| Current use of multivitamin, %                  | 52                       | 49                          | 49                       | 46                          |
| Regular use of NSAIDs, %                        | 24                       | 20                          | 15                       | 12                          |
| Physical activity, MET-hrs/wk                   | 11.1 (5.4-20.1)          | 11.3 (4.6-20.9)             | 23.0 (10.1-41.2)         | 19.9 (8.8-37.1)             |
| Pack-year among ever smokers                    | 24 (10-43)               | 25 (11-45)                  | 23 (13-40)               | 24 (13-43)                  |
| Total calorie, kcal/d                           | 1673 (1394-1956)         | 1615 (1358-1936)            | 1878 (1584-2312)         | 1859 (1563-2287)            |
| Alcohol intake, g/d                             | 2.0 (0.4-7.8)            | 2.5 (0.3-8.7)               | 8.1 (1.8-21.0)           | 7.4 (1.3-17.4)              |
| Red and processed meat, servings/wk             | 5.8 (3.9-7.9)            | 5.9 (4.1-8.3)               | 5.8 (3.6-9.1)            | 5.9 (3.2-8.9)               |
| Calcium, mg/d                                   | 880 (681-1114)           | 850 (648-1110)              | 834 (679-1100)           | 831 (645-1102)              |
| Folate, µg/d/                                   | 386 (297-531)            | 376 (274-516)               | 467 (342-656)            | 478 (347-679)               |
| Alternate Healthy Eating Index (AHEI)†<br>2010† | 46.4 (40.6-52.6)         | 46.7 (40.5-53.4)            | 47.6 (41.1-55.0)         | 47.8 (41.1-55.0)            |
| Stage, %                                        |                          |                             |                          |                             |
| I                                               | 24                       | 24                          | 28                       | 26                          |
| II                                              | 35                       | 26                          | 28                       | 17                          |
| III                                             | 27                       | 25                          | 29                       | 21                          |
| IV                                              | 14                       | 25                          | 14                       | 37                          |
| Tumor differentiation, %                        |                          |                             |                          |                             |
| Well or moderately differentiated               | 88                       | 93                          | 93                       | 96                          |
| Poorly differentiated                           | 12                       | 7                           | 7                        | 4                           |
| Tumor location, %                               |                          |                             |                          |                             |
| Rectum                                          | 21                       | 23                          | 23                       | 28                          |
| Distal colon                                    | 28                       | 31                          | 31                       | 39                          |
| Proximal colon                                  | 51                       | 47                          | 46                       | 33                          |

\*All values other than age have been directly standardized to age distribution (in 5-year age group) of all the participants. Median (25th-75th percentile) was presented for continuous variables.

†Without alcohol intake

**Supplemental Table 2. Regular aspirin use and risk of colorectal cancer by stage and tumor-infiltrating lymphocytes**

| Stage | Stage I/II          | Cases, No. (n=769)<br>Multivariable RR (95% CI)* | Aspirin use      |                   |
|-------|---------------------|--------------------------------------------------|------------------|-------------------|
|       |                     |                                                  | Nonregular users | Regular users     |
|       |                     |                                                  | 459              | 310               |
|       |                     |                                                  | 1 (reference)    | 0.76 (0.66, 0.89) |
|       | <b>Stage III/IV</b> | Cases, No. (n=554)<br>Multivariable RR (95% CI)* | 333              | 221               |
|       |                     |                                                  | 1 (reference)    | 0.76 (0.64, 0.91) |
|       | <b>Stage I/II</b>   | <b>Tumor-infiltrating lymphocytes</b>            |                  |                   |
|       |                     | <b>Low</b>                                       |                  |                   |
|       |                     | Cases, No. (n=533)<br>Multivariable RR (95% CI)* | 333              | 200               |
|       |                     |                                                  | 1 (reference)    | 0.68 (0.57, 0.82) |
|       |                     | <b>Intermediate/high</b>                         |                  |                   |
|       |                     | Cases, No. (n=236)<br>Multivariable RR (95% CI)* | 126              | 110               |
|       |                     |                                                  | 1 (reference)    | 0.97 (0.75, 1.26) |
|       | <b>Stage III/IV</b> | <b>Tumor-infiltrating lymphocytes</b>            |                  |                   |
|       |                     | <b>Low</b>                                       |                  |                   |
|       |                     | Cases, No. (n=449)<br>Multivariable RR (95% CI)* | 277              | 172               |
|       |                     |                                                  | 1 (reference)    | 0.71 (0.59, 0.87) |
|       |                     | <b>Intermediate/high</b>                         |                  |                   |
|       |                     | Cases, No. (n=105)<br>Multivariable RR (95% CI)* | 56               | 49                |
|       |                     |                                                  | 1 (reference)    | 1.03 (0.70, 1.52) |

\*Adjusted for the same set of covariates as in Table 2.

**Supplemental Table 3. Regular aspirin use, tumor-infiltrating lymphocytes and colorectal cancer-specific mortality**

|                                              | Nonregular users | Regular users    |
|----------------------------------------------|------------------|------------------|
| <b>Tumor-infiltrating lymphocytes (TILs)</b> |                  |                  |
| <b>Low</b>                                   |                  |                  |
| Cases, No.                                   | 665              | 422              |
| Events, No.                                  | 219              | 126              |
| Univariate RR (95% CI)                       | 1 (reference)    | 0.93 (0.74-1.15) |
| Multivariable RR (95% CI)*                   | 1 (reference)    | 0.88 (0.70-1.10) |
| <b>Intermediate/high</b>                     |                  |                  |
| Cases, No                                    | 220              | 147              |
| Events, No                                   | 36               | 37               |
| Univariate RR (95% CI)                       | 0.51 (0.36-0.73) | 0.66 (0.47-0.94) |
| Multivariable RR (95% CI)*                   | 0.53 (0.36-0.76) | 0.66 (0.46-0.96) |
| <b>P<sub>interaction</sub>†</b>              |                  |                  |
| Univariate model                             |                  | 0.20             |
| Multivariable model                          |                  | 0.17             |

\*The multivariable Cox regression model initially included sex, age at diagnosis, year of diagnosis, family history of colorectal cancer, prediagnosis body mass index, tumor differentiation, tumor location, microsatellite instability status, CpG island methylator phenotype-specific promoter status, long interspersed nucleotide element-1 hypomethylation level, PTGS2 expression, and *KRAS*, *BRAF*, *PIK3CA* mutations. A backward elimination with a threshold *P* of 0.05 was used to select variables for the final models.

† $P_{\text{interaction}}$  (two-sided) was calculated using the Wald test for the cross-product of regular aspirin use (regular vs. nonregular) and TILs (intermediate/high vs low) in the Cox regression model.

**Supplemental Table 4. Regular use of NSAIDs and risk of colorectal cancer overall and by components of lymphocytic reaction**

|                                              | NHS               |                   | HPFS              |                   | Combined          |                   | P <sub>heterogeneity</sub> |
|----------------------------------------------|-------------------|-------------------|-------------------|-------------------|-------------------|-------------------|----------------------------|
|                                              | Nonregular users* | Regular users*    | Nonregular users* | Regular users*    | Nonregular users* | Regular users*    |                            |
| <b>Total colorectal cancer</b>               |                   |                   |                   |                   |                   |                   |                            |
| Person-years                                 | 1237311           | 1184473           | 453472            | 522072            | 1690783           | 1706545           |                            |
| Cases, No. (n=1458)                          | 426               | 404               | 286               | 342               | 712               | 746               |                            |
| Age-adjusted RR (95% CI)                     | 1 (reference)     | 0.82 (0.71, 0.94) | 1 (reference)     | 0.89 (0.75, 1.04) | 1 (reference)     | 0.85 (0.76, 0.94) |                            |
| Multivariable RR (95% CI)†                   | 1 (reference)     | 0.82 (0.71, 0.94) | 1 (reference)     | 0.99 (0.79, 1.25) | 1 (reference)     | 0.85 (0.76, 0.94) |                            |
| <b>Tumor-infiltrating lymphocytes (TILs)</b> |                   |                   |                   |                   |                   |                   |                            |
| <b>Low</b>                                   |                   |                   |                   |                   |                   |                   |                            |
| Cases, No. (n=1087)                          | 311               | 280               | 234               | 262               | 545               | 542               |                            |
| Age-adjusted RR (95% CI)                     | 1 (reference)     | 0.78 (0.67, 0.92) | 1 (reference)     | 0.82 (0.69, 0.99) | 1 (reference)     | 0.80 (0.71, 0.90) | 0.03                       |
| Multivariable RR (95% CI)†                   | 1 (reference)     | 0.78 (0.66, 0.92) | 1 (reference)     | 0.83 (0.69, 1.00) | 1 (reference)     | 0.80 (0.71, 0.91) | 0.04                       |
| <b>Intermediate</b>                          |                   |                   |                   |                   |                   |                   |                            |
| Cases, No. (n=221)                           | 70                | 72                | 36                | 43                | 106               | 115               |                            |
| Age-adjusted RR (95% CI)                     | 1 (reference)     | 0.86 (0.62, 1.20) | 1 (reference)     | 0.94 (0.60, 1.50) | 1 (reference)     | 0.89 (0.68, 1.16) |                            |
| Multivariable RR (95% CI)†                   | 1 (reference)     | 0.87 (0.62, 1.21) | 1 (reference)     | 0.95 (0.60, 1.50) | 1 (reference)     | 0.89 (0.68, 1.17) |                            |
| <b>High</b>                                  |                   |                   |                   |                   |                   |                   |                            |
| Cases, No. (n=146)                           | 44                | 51                | 15                | 36                | 59                | 87                |                            |
| Age-adjusted RR (95% CI)                     | 1 (reference)     | 0.99 (0.66, 1.49) | 1 (reference)     | 1.73 (0.94, 3.19) | 1 (reference)     | 1.18 (0.85, 1.66) |                            |
| Multivariable RR (95% CI)†                   | 1 (reference)     | 1.00 (0.66, 1.50) | 1 (reference)     | 1.70 (0.92, 3.14) | 1 (reference)     | 1.18 (0.85, 1.65) |                            |
| <b>Intratumoral periglandular reaction</b>   |                   |                   |                   |                   |                   |                   |                            |
| <b>Low</b>                                   |                   |                   |                   |                   |                   |                   |                            |
| Cases, No. (n=191)                           | 61                | 52                | 34                | 44                | 95                | 96                | 0.08                       |
| Age-adjusted RR (95% CI)                     | 1 (reference)     | 0.73 (0.50, 1.06) | 1 (reference)     | 0.74 (0.47, 1.16) | 1 (reference)     | 0.73 (0.55, 0.98) | 0.09                       |
| Multivariable RR (95% CI)†                   | 1 (reference)     | 0.72 (0.50, 1.05) | 1 (reference)     | 0.74 (0.47, 1.17) | 1 (reference)     | 0.73 (0.55, 0.97) |                            |
| <b>Intermediate</b>                          |                   |                   |                   |                   |                   |                   |                            |
| Cases, No. (n=1077)                          | 307               | 295               | 227               | 248               | 534               | 543               |                            |
| Age-adjusted RR (95% CI)                     | 1 (reference)     | 0.84 (0.71, 0.98) | 1 (reference)     | 0.85 (0.71, 1.03) | 1 (reference)     | 0.84 (0.75, 0.95) |                            |
| Multivariable RR (95% CI)†                   | 1 (reference)     | 0.84 (0.71, 0.98) | 1 (reference)     | 0.86 (0.72, 1.04) | 1 (reference)     | 0.85 (0.75, 0.96) |                            |
| <b>High</b>                                  |                   |                   |                   |                   |                   |                   |                            |
| Cases, No. (n=186)                           | 54                | 57                | 25                | 50                | 79                | 107               |                            |
| Age-adjusted RR (95% CI)                     | 1 (reference)     | 0.89 (0.61, 1.29) | 1 (reference)     | 1.40 (0.86, 2.30) | 1 (reference)     | 1.05 (0.78, 1.41) |                            |
| Multivariable RR (95% CI)†                   | 1 (reference)     | 0.89 (0.61, 1.30) | 1 (reference)     | 1.36 (0.83, 2.23) | 1 (reference)     | 1.05 (0.78, 1.41) |                            |
| <b>Peritumoral lymphocytic</b>               |                   |                   |                   |                   |                   |                   |                            |

| <b>reaction</b>                       |               |                   |               |                   |               |                   |      |
|---------------------------------------|---------------|-------------------|---------------|-------------------|---------------|-------------------|------|
| <b>Low</b>                            |               |                   |               |                   |               |                   |      |
| Cases, No. (n=205)                    | 60            | 55                | 39            | 51                | 99            | 106               |      |
| Age-adjusted RR (95% CI)              | 1 (reference) | 0.79 (0.55, 1.14) | 1 (reference) | 0.76 (0.50, 1.17) | 1 (reference) | 0.78 (0.59, 1.03) | 0.06 |
| Multivariable RR (95% CI)†            | 1 (reference) | 0.79 (0.54, 1.14) | 1 (reference) | 0.77 (0.50, 1.18) | 1 (reference) | 0.78 (0.59, 1.03) | 0.07 |
| <b>Intermediate</b>                   |               |                   |               |                   |               |                   |      |
| Cases, No. (n=1012)                   | 297           | 279               | 216           | 220               | 513           | 499               |      |
| Age-adjusted RR (95% CI)              | 1 (reference) | 0.82 (0.69, 0.97) | 1 (reference) | 0.82 (0.67, 0.99) | 1 (reference) | 0.82 (0.72, 0.93) |      |
| Multivariable RR (95% CI)†            | 1 (reference) | 0.82 (0.69, 0.97) | 1 (reference) | 0.83 (0.68, 1.01) | 1 (reference) | 0.82 (0.72, 0.93) |      |
| <b>High</b>                           |               |                   |               |                   |               |                   |      |
| Cases, No. (n=231)                    | 63            | 70                | 30            | 68                | 93            | 138               |      |
| Age-adjusted RR (95% CI)              | 1 (reference) | 0.93 (0.66, 1.30) | 1 (reference) | 1.50 (0.96, 2.33) | 1 (reference) | 1.12 (0.86, 1.46) |      |
| Multivariable RR (95% CI)†            | 1 (reference) | 0.93 (0.66, 1.31) | 1 (reference) | 1.46 (0.94, 2.27) | 1 (reference) | 1.11 (0.85, 1.45) |      |
| <b>Crohn's-like lymphoid reaction</b> |               |                   |               |                   |               |                   |      |
| <b>Low</b>                            |               |                   |               |                   |               |                   |      |
| Cases, No. (n=899)                    | 271           | 254               | 177           | 197               | 448           | 451               |      |
| Age-adjusted RR (95% CI)              | 1 (reference) | 0.81 (0.68, 0.96) | 1 (reference) | 0.80 (0.65, 0.98) | 1 (reference) | 0.80 (0.70, 0.92) | 0.24 |
| Multivariable RR (95% CI)†            | 1 (reference) | 0.81 (0.68, 0.96) | 1 (reference) | 0.80 (0.65, 0.99) | 1 (reference) | 0.80 (0.70, 0.92) | 0.30 |
| <b>Intermediate</b>                   |               |                   |               |                   |               |                   |      |
| Cases, No. (n=205)                    | 58            | 53                | 39            | 55                | 97            | 108               |      |
| Age-adjusted RR (95% CI)              | 1 (reference) | 0.79 (0.54, 1.15) | 1 (reference) | 1.14 (0.74, 1.74) | 1 (reference) | 0.93 (0.70, 1.23) |      |
| Multivariable RR (95% CI)†            | 1 (reference) | 0.79 (0.54, 1.15) | 1 (reference) | 1.10 (0.72, 1.68) | 1 (reference) | 0.91 (0.69, 1.21) |      |
| <b>High</b>                           |               |                   |               |                   |               |                   |      |
| Cases, No. (n=86)                     | 26            | 27                | 12            | 21                | 38            | 48                |      |
| Age-adjusted RR (95% CI)              | 1 (reference) | 0.87 (0.51, 1.50) | 1 (reference) | 1.21 (0.59, 2.49) | 1 (reference) | 0.98 (0.64, 1.51) |      |
| Multivariable RR (95% CI)†            | 1 (reference) | 0.87 (0.51, 1.50) | 1 (reference) | 1.15 (0.56, 2.39) | 1 (reference) | 0.96 (0.63, 1.48) |      |

\*The reference group included individuals who regularly used neither aspirin nor other NSAIDs, and the comparison group included individuals who used aspirin and/or other NSAIDs regularly.

†Adjusted for family history of colorectal cancer (*yes/no*), history of diabetes (*yes/no*), body mass index (*quartile*), history of colonoscopy/sigmoidoscopy (*yes/no*), smoking in pack-years (*never, 0.1-4.9, 5-19.9, 20-39.9, ≥40*), physical activity (*quartile*), alcohol intake (*0, 0.1-4.9, 5-14.9, 15-29.9, ≥30 g/d*), current multivitamin use (*yes/no*), total energy intake (*quartile*), folate (*quartile*), calcium (*quartile*), red and processed meat intake (*quartile*), and Alternate Healthy Eating Index-2010 without alcohol (*quartile*). For women, we additionally adjusted for menopause status/menopausal hormone therapy (MHT) (*premenopausal, postmenopausal and never use of MHT, postmenopausal and past use of MHT, postmenopausal and current use of MHT*). The Cox models were also conditioned on age in months, calendar year of the questionnaire cycle and sex/cohort (in the combined cohort analysis).
